# Supplementary material for: High Expression of MRE11A, the Gene Involved in the Resection Step During Homologous Recombination, Is Associated with Shorter Survival and a Higher Risk of Death in CRC Patients
Source: Preprints.org preprint supplement (doi:10.20944/preprints202305.1126.v1), 2023-05-16
Supplement: Supplementary file 1 [file Legend supplementary figure 1.docx]

**Supplementary Figure 1.** Representative images of MSI panel by immunohistochemistry. (A) MMR proficient/MSS CRC; MMR deficient/MSI CRC due to loss of (B) MLH1/PMS2 expression or (C) MSH2/MSH6 expression. Original magnification 100×.
