# Supplementary material for: High Expression of MRE11A, the Gene Involved in the Resection Step During Homologous Recombination, Is Associated with Shorter Survival and a Higher Risk of Death in CRC Patients
Source: Preprints.org preprint supplement (doi:10.20944/preprints202305.1126.v1), 2023-05-16
Supplement: Supplementary file 2 [file Supplementary Table 1.docx]

| **Supplementary Table 1.** Mean fold-change of HRR gene according to MMR status. | | | |
| --- | --- | --- | --- |
|  | **Mean difference** | **IC 95%** | **P** |
| *MREA11* | -2.43 | - 4.96 – 0.10 | **0.005** |
| *RAD50* | -1.82 | -5.32 – 1.67 | 0.296 |
| *NBN* | -0.57 | - 4.18 – 3.06 | 0.726 |
| *BARD1* | -0.12 | - 2.31 – 2.55 | 0.914 |
| *BRCA1* | -3.07 | - 1.12 – 7.27 | 0.148 |
| *RBBP8* | -1.55 | - 3.18 – 6.29 | 0.512 |
| *PALB2* | -1.14 | - 2.18 – 4.47 | 0.836 |
| T-test for mean equality. *p (2-sided) < 0.05 | | | |
