# Supplementary material for: High Expression of MRE11A, the Gene Involved in the Resection Step During Homologous Recombination, Is Associated with Shorter Survival and a Higher Risk of Death in CRC Patients
Source: Preprints.org preprint supplement (doi:10.20944/preprints202305.1126.v1), 2023-05-16
Supplement: Supplementary file 3 [file Supplementary Table 2.docx]

| **Supplementary Table 2.** Mean fold-change of HRR representative genes according to composite inflammatory blood indexes. | | | | | | | | | | | | | | | |
| --- | --- | --- | --- | --- | --- | --- | --- | --- | --- | --- | --- | --- | --- | --- | --- |
|  |  | ***MRE11A*** | ***P*** | ***RAD50*** | ***p*** | ***NBN*** | ***p*** | ***BARD1*** | ***p*** | ***BRCA1*** | ***p*** | ***RBBP8*** | ***p*** | ***PALB2*** | ***p*** |
| **LMR** | Low | 1.49 | 0.720 | -1.39 | 0.239 | 0.11 | **0.039** | 2.02 | 0.141 | 0.81 | 0.574 | -0.44 | 0.292 | 2.34 | 0.746 |
| High | 1.85 | -2.73 | 2.18 | 3.18 | 1.56 | -2.04 | 2.71 |
| **NLR** | Low | 1.64 | 0.939 | -3.88 | 0.706 | 2.08 | 0.102 | 2.83 | 0.561 | 2.99 | **0.004** | -0.12 | 0.132 | 3.61 | **0.038** |
| High | 1.71 | -1.85 | 0.21 | 2.37 | -0.67 | 3.65 | 1.36 |
| **PLR** | Low | 1.45 | 0.665 | -2.89 | 0.142 | 2.14 | 0.081 | 3.07 | 0.232 | 1.82 | 0.331 | -1.13 | 0.882 | 2.39 | 0.799 |
| High | 1.90 | -1.23 | 0.15 | 2.12 | -0.54 | -1.36 | 2.67 |
| **Abbreviations:** LMR, Lymphocyte-to-monocyte ratio; NLR, Neutrophil-to-monocyte-ratio; PLR, Platelet-to-lymphocyte ratio. Fold-change means were compared with one-way ANOVA. Mean difference between groups is significant at the 0.05 level (2-tailed) (highlighted in bold). | | | | | | | | | | | | | | | |
