# Supplementary material for: High Expression of MRE11A, the Gene Involved in the Resection Step During Homologous Recombination, Is Associated with Shorter Survival and a Higher Risk of Death in CRC Patients
Source: Preprints.org preprint supplement (doi:10.20944/preprints202305.1126.v1), 2023-05-16
Supplement: Supplementary file 4 [file Supplementary Table 3.docx]

| **Supplementary Table 3.** Associations between inflammatory blood indexes and clinicopathological features of CRC patients. | | | | |
| --- | --- | --- | --- | --- |
|  |  | **LMR** | **NLR** | **PLR** |
| Gender | χ2 | 1.471 | 3.015 | 0.476 |
| *p* | 0.297 | 0.070 | 0.603 |
| Age at diagnosis | χ2 | **4.573** | 0.014 | 0.014 |
| *p* | **0.029*** | 0.999 | 0.999 |
| Tumor site | χ2 | 0.128 | 0.476 | 0.028 |
| *p* | 0.462 | 0.603 | 0.998 |
| Sidedness | χ2 | 0.014 | 0.631 | 1.026 |
| *p* | 0.999 | 0.511 | 0.501 |
| Tumor size | χ2 | **3.971** | **6.565** | 2.908 |
| *p* | **0.043*** | **0.021*** | 0.086 |
| Tumor grade | χ2 | 1.471 | 3.015 | 0.028 |
| *p* | 0.297 | 0.117 | 0.998 |
| Tumor invasive depth | χ2 | 0.255 | **7.960** | 0.235 |
| *p* | 0.744 | **0.008*** | 0.774 |
| Nodal metastasis | χ2 | 0.429 | 0.429 | 0.429 |
| *p* | 0.613 | 0.613 | 0.613 |
| TNM stage | χ2 | 0.384 | 0.384 | 0.013 |
| *p* | 0.616 | 0.616 | 0.999 |
| Lymphovascular invasion | χ2 | 0.136 | 0.136 | 0.412 |
| *p* | 0.802 | 0.802 | 0.616 |
| Perineural invasion | χ2 | **3.278** | **3.207** | 0.005 |
| *p* | **0.044*** | **0.040*** | 1.000 |
| MSI | χ2 | 0.648 | 2.439 | 0.002 |
| *p* | 0.474 | 0.118 | 1.000 |
| χ2 test and Fisher’s exact test. *Correlation is significant at the 0.05 level (2-tailed). | | | | |
